# Supplementary material
Source: Springer Nature journal article supplement (https://www.springermedizin.de/resource/supplementary/13058_2007_2162_MOESM9_ESM.pdf/9700776)
Supplement: MOESM9 [file 9700776]

**Table 1: mRNA Expression Analysis**

| <b><u>Gene</u></b> | <b><u>Epithelium rich signal</u></b> | <b><u>Stroma only signal</u></b>          | <b><u>Ratio (epi/stroma)</u></b> | <b><u>Signal Log Ratio</u></b> | <b><u>QRT-PCR</u></b> |
|--------------------|--------------------------------------|-------------------------------------------|----------------------------------|--------------------------------|-----------------------|
| <i>Egfr</i>        | 1491, 2009, 2627                     | 2668, 3436, 5817                          | 0.5, 0.6, 0.4                    | -1, -0.8, -1.1                 | 0.5, 0.4, 0           |
| <i>ErbB2</i>       | absent, absent, absent               | absent, absent, absent                    | N/A, N/A, N/A                    | < 1 fold change                | 0.7, 1.6, 2           |
| <i>ErbB3</i>       | 876, 915, 1000                       | 399, 208, 244                             | 2.2, 4.4, 4.1                    | 1.8, 2.4, 2.4                  | 1.9, 10.1, 1          |
| <i>ErbB4</i>       | absent, absent, absent               | 59, 45, absent                            | N/A, N/A, N/A                    | < 1 fold change                | 0.6, 23.1, 1          |
| <i>Nrg1</i>        | absent, absent, absent               | absent, absent, absent                    | N/A, N/A, N/A                    | < 1 fold change                | 7.3, 10.9, 1          |
| <i>Nrg2</i>        | 287, absent, 154                     | 146, absent, 82                           | 2.0, N/A, 1.9                    | < 1 fold change                | 2.6, 4.7, 5           |
| <i>Nrg3</i>        | 78, 116, absent                      | absent, 64, absent                        | N/A, 1.8, N/A                    | < 1 fold change                | N/A, N/A, 1           |
| <i>Nrg4</i>        | 1808, 1590, 1207                     | 2695, 1813, 1766                          | 0.7, 0.9, 0.7                    | -0.6, N/A, -0.5                | 0.6, 0.9, 0           |
| <i>Ar</i>          | 425, 2051, 2072                      | absent, absent, absent<br>(43.6, 7.9, 33) | N/A, N/A, N/A<br>(9.8, 260, 63)  | 3.3, 7.8, 5.5                  | 11.3, 195, 1          |
| <i>Tgfa</i>        | 100, absent, 391                     | absent, absent, 91.8                      | 2.2, 1.8, 4.3                    | < 1 fold change                | not tested            |
| <i>Egf</i>         | 83, absent, 68                       | 48, 112, 100                              | 1.7, N/A, 0.7                    | < 1 fold change                | not tested            |
| <i>Btc</i>         | 179, 266, 216                        | 262, 148, 154                             | 0.7, 1.8, 1.4                    | N/A, 0.9, N/A                  | not tested            |
| <i>Hbegf</i>       | 184, absent, 103                     | 173, 121, 137                             | 1.1, N/A, 0.8                    | < 1 fold change                | not tested            |
| <i>Ereg</i>        | absent, 50, 59                       | 17, absent, absent                        | N/A, N/A, N/A                    | < 1 fold change                | not tested            |
